# Supplementary material for: Biological phosphorylated molecules participate in the biomimetic and biological synthesis of cadmium sulphide quantum dots by promoting H2S release from cellular thiols
Source: Royal Society of Chemistry journal article supplement (doi:10.1039/c7ra03578k), 2017-01-01
Supplement: c7ra03578k1.pdf [file c7ra03578k1.pdf]

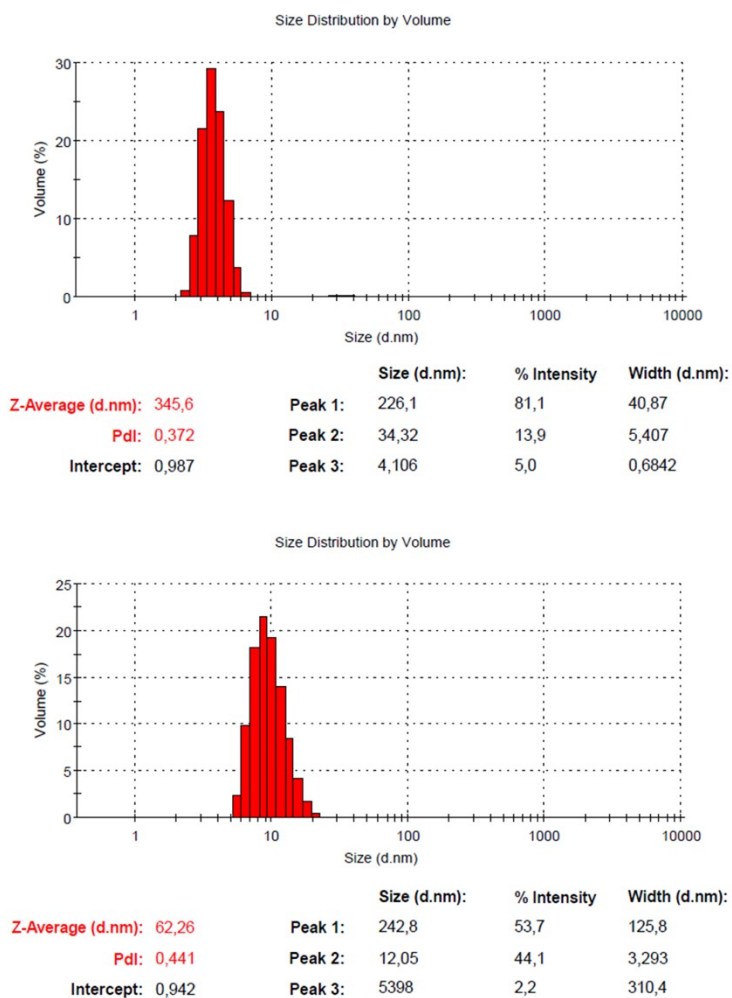

**Fig. S1. DLS size determination of CdS QDs.** DLS measurements were conducted on blue-green (top) and orange-red (bottom) solutions. Results are informed as volume (%) versus size (nm). Z-average size and polydispersity Index (PDI) are informed at the bottom each image.
